# Supplementary material for: Radiomics Based on the Tumor–Parenchyma Invasive Interface Predicts Major Pathological Response to Neoadjuvant Immunochemotherapy in Non-small Cell Lung Cancer
Source: Research Square preprint supplement (doi:10.21203/rs.3.rs-7531855/v1), 2025-10-12
Supplement: Supplementary file 1 [file 34e1917d4a81d68bb8f4bb0e.docx]

Figure S1 LASSO Feature Selection for the Whole Tumor Region


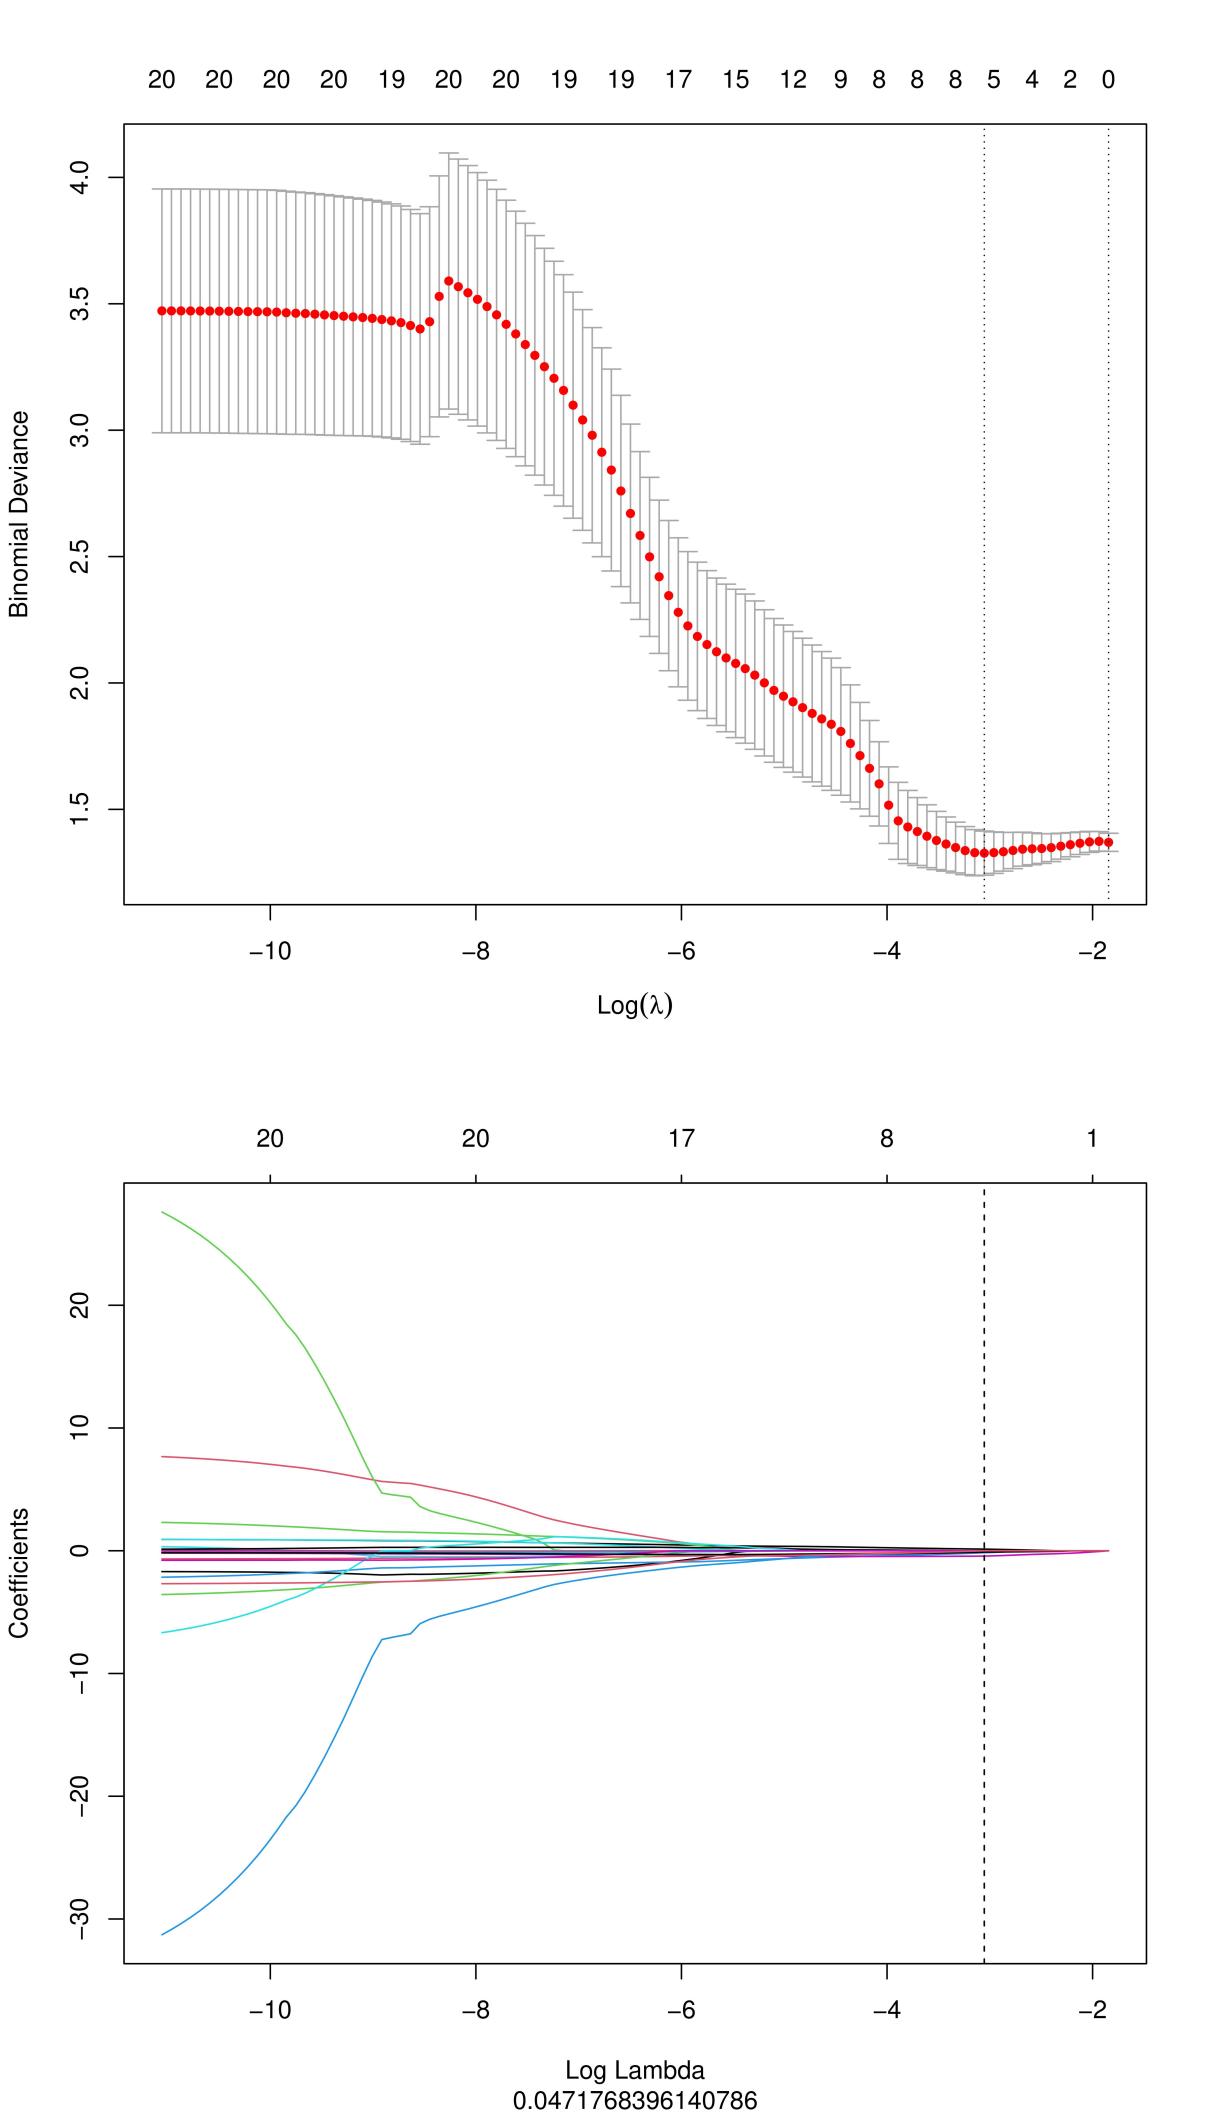


Figure S2 LASSO Feature Selection for the Tumor Margin Region

**
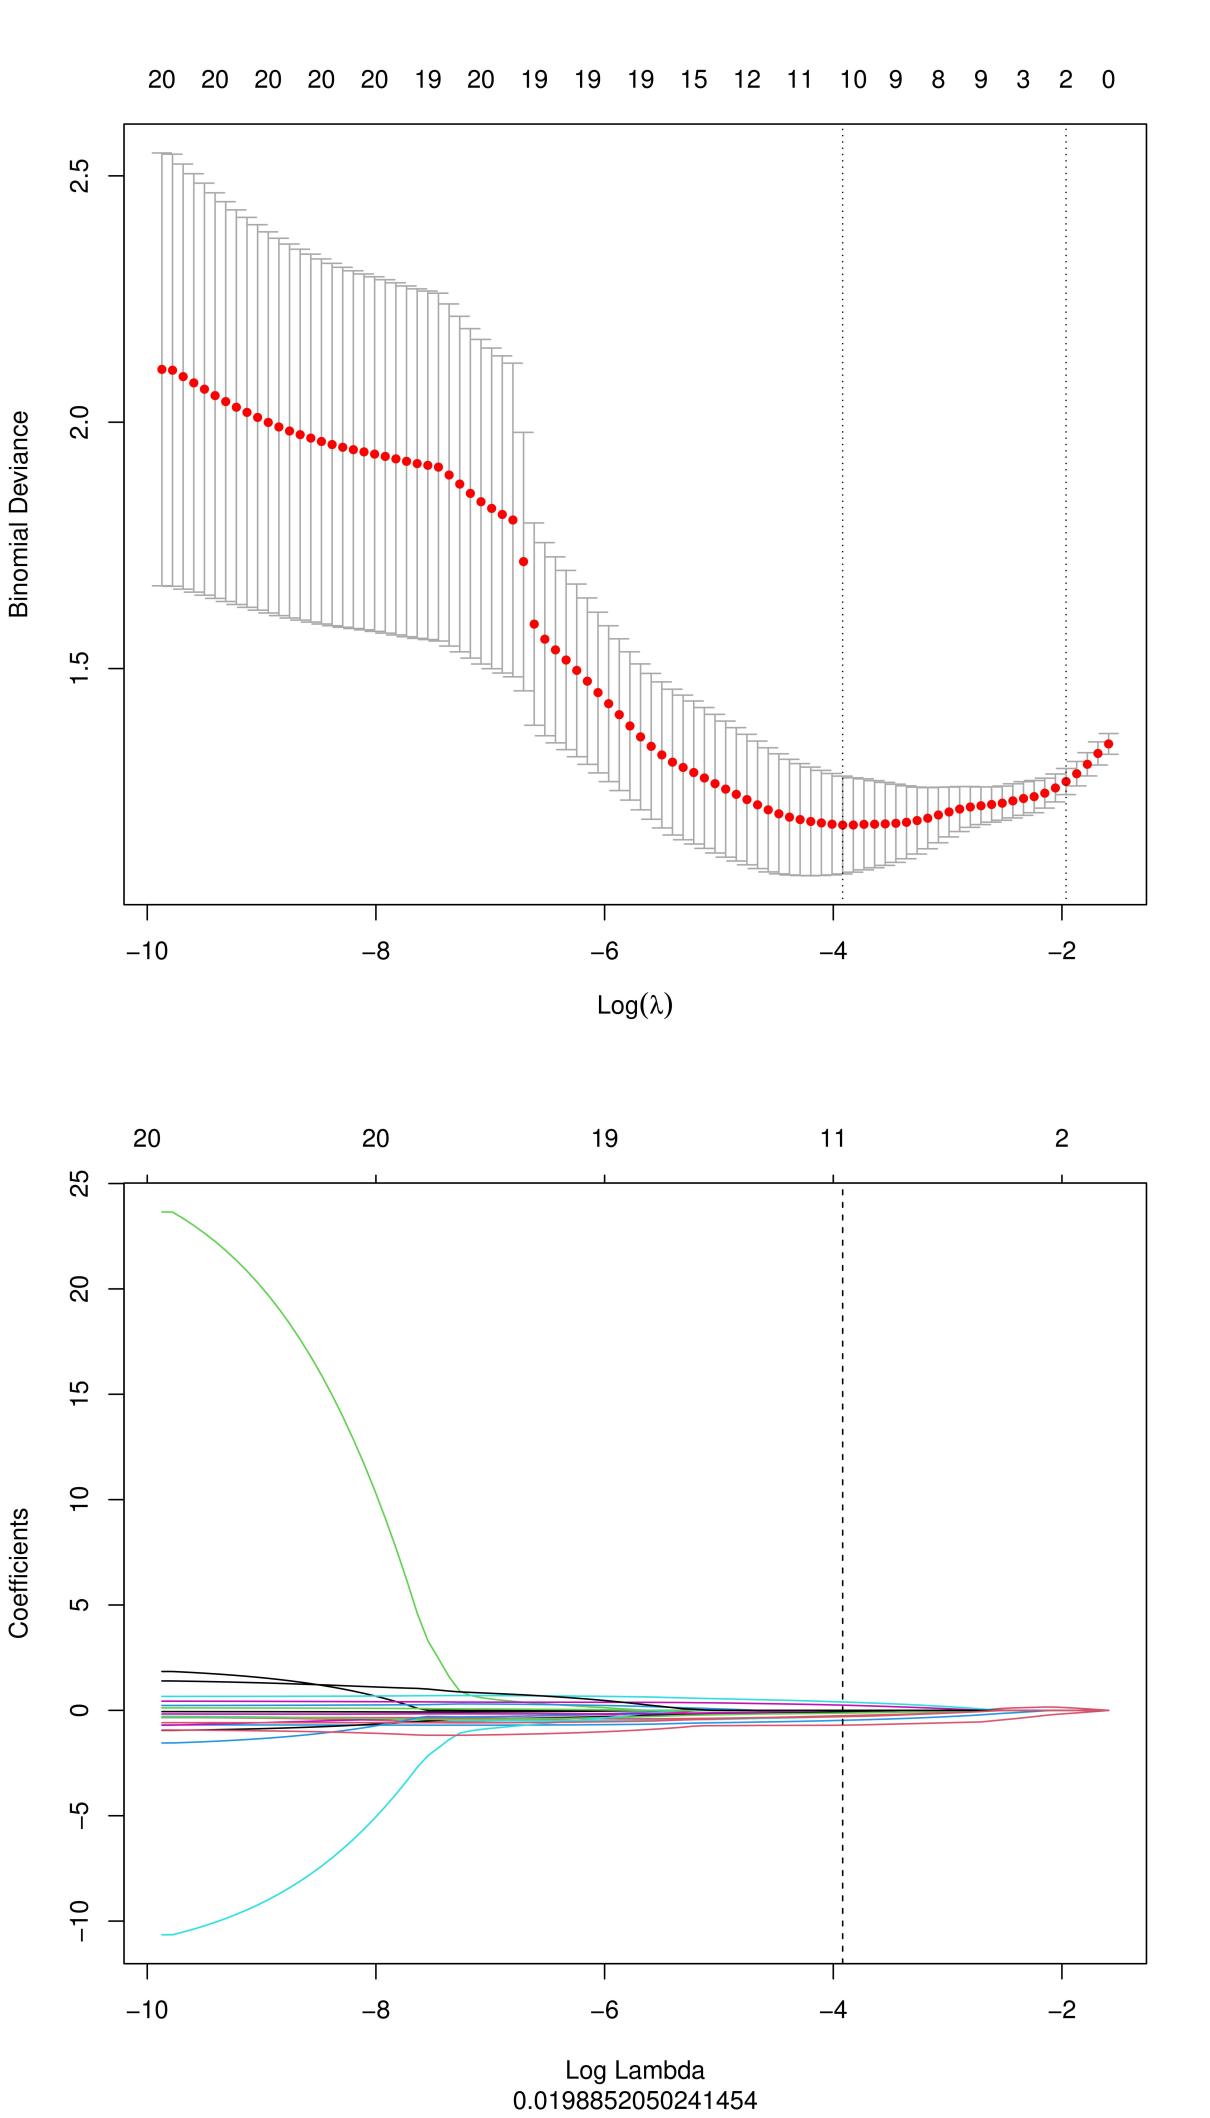
**

**Formula for Intratumoral Radiomics Score**

Rad-score=0.132564828842256*wavelet_HHH_glrlm_LongRunHighGrayLevelEmphasis+-0.00462411596096455*wavelet_HLL_glszm_LargeAreaHighGrayLevelEmphasis+-0.110074251401751*wavelet_HHH_glszm_SmallAreaLowGrayLevelEmphasis+-0.112394694809825*exponential_glcm_ClusterProminence+-0.165067053123905*exponential_glszm_ZoneVariance+-0.435037128334255*wavelet_HLL_glcm_Correlation+-0.443163932474384*(Intercept)

**Formula for Tumor Marginal Radiomics Score**

Rad-score=0.397423917721302*wavelet_LLH_firstorder_Skewness+0.247407565937007*wavelet_HHH_firstorder_Median+-0.0310479386957947*wavelet_HHH_glszm_LargeAreaHighGrayLevelEmphasis+-0.0664884842339231*exponential_glszm_ZoneEntropy+-0.129152856590973*squareroot_glszm_ZoneVariance+-0.250925833838904*lbp_2D_glrlm_RunEntropy+-0.291859978565058*exponential_glszm_ZoneVariance+-0.296122631859518*wavelet_HLH_glszm_LargeAreaHighGrayLevelEmphasis+-0.473276076545078*square_glszm_ZoneEntropy+-0.531155233674298*(Intercept)+-0.703817008575888*lbp_2D_firstorder_Kurtosis
